# Supplementary material
Source: Research Square preprint supplement (doi:10.21203/rs.3.rs-8766277/v1)

# UNESCO-Erbeformen in Deutschland

## Aufgaben

1. Nenne die Anzahl der Welterbestätten in Deutschland und in Niedersachsen.
2. Verorte die Beispiele A-E für Erbformen der UNESCO (M2) in der Karte (M1).
3. Nenne die Bundesländer, in denen (globale) Geoparks zu finden sind.
4. a) Überprüfe, ob in Niedersachsen Weltokumentenerbe zu finden ist.  
b) Bestimme das Bundesland mit dem meisten Weltokumentenerbe.
5. Bestimme die Anzahl der grenzüberschreitenden oder transnationalen Welterbstätten.
6. Plane eine fünftägige Reise in Deutschland, auf der du von allen Erbformen mindestens eine vor Ort besichtigen kannst.

## M2 Beispiele für UNESCO-Erbeformen

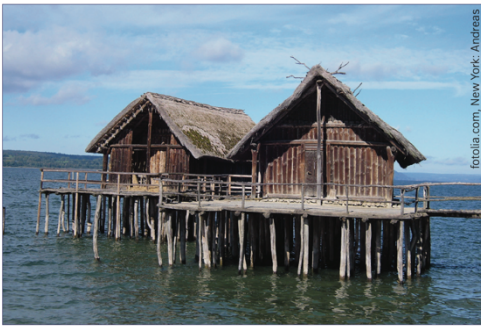

A Beispiel für Welterbe: Prähistorische Pfahlbauten um die Alpen (Foto: Rekonstruktion)

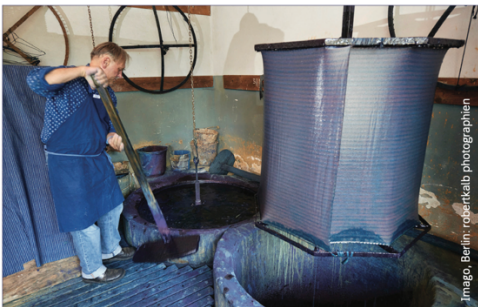

B Beispiel für immaterielles Kulturerbe: Blaudruck

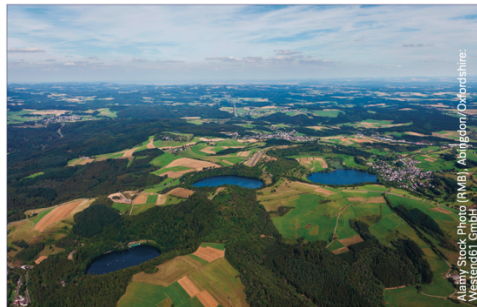

C Beispiel für einen Geopark: Vulkaneifel

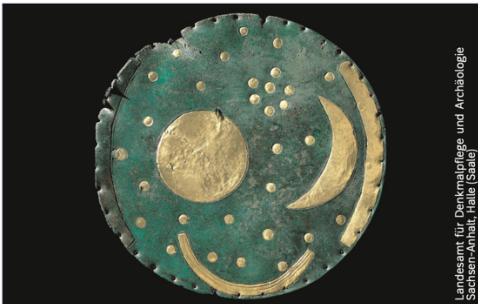

D Beispiel für Weltokumentenerbe: Himmelscheibe von Nebra

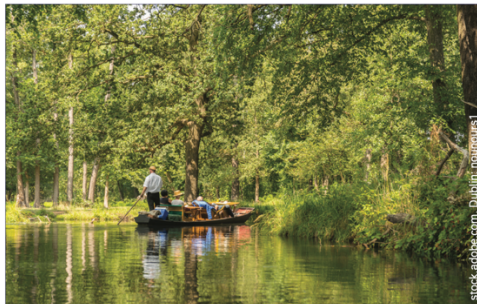

E Beispiel für ein Biosphärenreservat: Spreewald

**M1 UNESCO-Erbeformen in Deutschland (Stand: April 2022)**

**Welterbe – Kulturerbe**

- 1 Aachener Dom (Aachen; 1978)
- 2 Speyerer Dom (Speyer; 1981)
- 3 Würzburger Residenz und Hofgarten (Würzburg; 1981)
- 4 Wallfahrtskirche „Die Wies“ (Steingaden; 1983)
- 5 Schlösser Augustusburg u. Falkenlust in Brühl (Brühl; 1984)
- 6 Dom und Michaelskirche in Hildesheim (Hildesheim; 1985)
- 7 Römische Baudenkmäler, Dom und Liebfrauenkirche in Trier (Trier, Igel; 1986)
- 8 Hansestadt Lübeck (Lübeck; 1987)
- 9 Schlösser und Parks von Potsdam und Berlin (Berlin, Potsdam; 1990, erweitert 1992, 1999)
- 10 Kloster Lorsch (Lorsch; 1991)
- 11 Bergwerk Rammelsberg, Altstadt von Goslar und Oberharzer Wasserwirtschaft (Goslar, niedersächsischer Harz; 1992, erweitert 2010)
- 12 Altstadt von Bamberg (Bamberg; 1993)
- 13 Klosteranlage Maulbronn (Maulbronn; 1993)
- 14 Stiftskirche, Schloss und Altstadt von Quedlinburg (Quedlinburg; 1994)
- 15 Völklinger Hütte (Völklingen; 1994)
- 16 Kölner Dom (Köln; 1996)
- 17 Das Bauhaus und seine Stätten in Weimar, Dessau und Bernau (Weimar, Dessau, Bernau bei Berlin; 1996, erweitert 2017)
- 18 Lutherdenkstätten in Eisleben und Wittenberg (Eisleben, Wittenberg; 1996)
- 19 Klassisches Weimar (Weimar; 1998)
- 20 Museumsinsel Berlin (Berlin; 1999)
- 21 Wartburg (Eisenach; 1999)
- 22 Gartenreich Dessau-Wörlitz (Oranienbaum-Wörlitz, Dessau-Roßlau; 2000)
- 23 Klosterinsel Reichenau (Insel Reichenau; 2000)
- 24 Industriekomplex Zeche Zollverein in Essen (Essen; 2001)
- 25 Oberes Mittelrheintal (Rhein zwischen Bingen und Koblenz; 2002)
- 26 Altstädte von Stralsund und Wismar (Stralsund, Wismar; 2002)
- 27 Rathaus und Roland in Bremen (Bremen; 2004)
- 28 Muskauer Park/Park Muzakowski (Bad Muskau; 2004), mit Polen
- 29 Grenzen des Römischen Reiches – Obergermanisch-Raetischer Limes (von Bad Hönningen/Rheinbrohl am Rhein bis zum Kastell Eining an der Donau; Aufnahme der deutschen Stätte 2005), mit Großbritannien und Nordirland (1987, erweitert 2008)
- 30 Altstadt von Regensburg mit Stadtamhof (Regensburg; 2006)
- 31 Siedlungen der Berliner Moderne (Berlin; 2008)
- 32 Fagus-Werk in Alfeld (Alfeld; 2011)
- 33 Prähistorische Pfahlbauten um die Alpen (Alpenraum; 2011), mit Frankreich, Italien, Österreich, Schweiz, Slowenien
- 34 Markgräfliches Opernhaus Bayreuth (Bayreuth; 2012)
- 35 Bergpark Wilhelmshöhe (Kassel; 2013)
- 36 Karolingisches Westwerk und Civitas Corvey (Höxter; 2014)
- 37 Hamburger Speicherstadt und Kontorhausviertel mit Chilehaus (Hamburg; 2015)
- 38 Das architektonische Werk von Le Corbusier – ein herausragender Beitrag zur Moderne (Stuttgart; 2016), mit Argentinien, Belgien, Frankreich, Indien, Japan und der Schweiz
- 39 Höhlen und Eiszeitkunst der Schwäbischen Alb (Höhle Hohler Fels, Höhle Geißenklösterle, Sirgensteinhöhle, Bocksteinhöhle, Höhle Hohlenstein-Stadel, Vogelherdhöhle; 2017)
- 40 Archäologischer Grenzkomplex Haidhuben und Danewerk (Busdorf; mehrere Gemeinden in den Kreisen Schleswig-Flensburg und Rendsburg-Eckernförde; 2018)
- 41 Naumburger Dom (Naumburg; 2018)
- 42 Montanregion Erzgebirge/Krušnohoří (Montan- und

- Bergbaulandschaften im Erzgebirge; 2019), mit Tschechien
- 43 Augsburger Wassermanagement-System (Augsburg; 2019)
- 44 Grenzen des Römischen Reiches – Donaulimes (Verlauf in Niederbayern, u. a. Regensburg; 2021), mit Österreich und der Slowakei
- 45 SchUM-Stätten (Mainz, Worms, Speyer; 2021)
- 46 Grenzen des Römischen Reiches – Niedergermanischer Limes (Haus Bürgel bei Monheim, Remagen, Xanten; 2021), mit den Niederlanden
- 47 Mathildenhöhe Darmstadt (Darmstadt; 2021)
- 48 Bedeutende Kurstädte Europas (in Deutschland: Baden-Baden, Bad Kissingen, Bad Ems; 2021), mit Belgien, Großbritannien und Nordirland, Frankreich, Italien, Österreich, Tschechien

**Welterbe – Naturerbe**

- 1 Grube Messel (Messel; 1995)
- 2 Wattenmeer (in Deutschland: NP Hamburgisches Wattenmeer, NP Niedersächsisches Wattenmeer, NP Schleswig-Holsteinisches Wattenmeer; 2009, erweitert 2014), mit Dänemark und den Niederlanden
- 3 Alte Buchenwälder und Buchenurwälder der Karpaten und anderer Regionen Europas (Jasmund, Hainich, Kellerwald-Edersee, Serrahn, Grumsin; Aufnahme der deutschen Stätten 2011), mit der Slowakei und der Ukraine (2007) sowie Albanien, Belgien, Bulgarien, Italien, Kroatien, Österreich, Rumänien, Slowenien, Spanien, Ukraine (2017)

**Weltdokumentenerbe**

Es ist nur der jeweils erstgenannte Ort in die Karte aufgenommen worden.

- 1 Tondokumente traditioneller Musik 1893–1952 (Edison-Zylinder) des Berliner Phonogrammarchivs (Berlin; 1999)
- 2 Gutenberg-Bibel (Göttingen; 2001)
- 3 Goethes literarischer Nachlass (Weimar; 2001)
- 4 Beethovens Neunte Sinfonie (in Deutschland: Berlin, Bonn; 2001)
- 5 Fritz Langs Stummfilmklassiker „Metropolis“ (Wiesbaden; 2001)
- 6 Reichenauer Handschriften (in Deutschland: München, Bamberg, Darmstadt, Trier, Aachen)
- 7 Kinder- und Hausmärchen der Brüder Grimm (Kassel; 2005)
- 8 Waldseemüllerkarte von 1507 (Washington [USA]; 2005)
- 9 Renaissance-Bibliothek des Mathias Corvinus (in Deutschland: München, Wolfenbüttel; 2005)
- 10 Briefwechsel von Gottfried Wilhelm Leibniz (Hannover; 2007)
- 11 Nibelungenlied (in Deutschland: München, Karlsruhe; 2009)
- 12 Benz-Patent von 1886 (Fellbach; 2011)
- 13 Dokumente zum Bau und Fall der Berliner Mauer und der Zwei-Plus-Vier-Vertrag (Berlin, Frankfurt a. M., Potsdam, Hamburg, Kleinmachnow; 2011)
- 14 Lorschers Arzneibuch (Bamberg; 2013)
- 15 Himmelscheibe von Nebra (Halle/Saale; 2013)
- 16 Die goldene Bulle (in Deutschland: Frankfurt a. M., Darmstadt, Nürnberg, München, Stuttgart; 2013)
- 17 Schriften von Karl Marx „Das Manifest der Kommunistischen Partei“ und „Das Kapital“ (Amsterdam; 2013)
- 18 Frühe Schriften der Reformationsbewegung (Wolfenbüttel, Dresden, Dessau, Berlin, Weimar, Gotha, Wittenberg, Heidelberg, Worms, Jena; 2015)
- 19 Autograph der h-Moll-Messe von Johann Sebastian Bach (Berlin; 2015)
- 20 Goldener Brief des birmanischen Königs Alaungphaya an den britischen König George II. (Hannover; 2015)
- 21 Handschriften des Buches „Al-Masaalik Wa Al-Mamaalik“ (Gotha; 2015)
- 22 Digitale Sammlung zur sprachlichen Vielfalt (Nijmegen; 2015)
- 23 Verfahrensunterlagen und Tonbandaufnahmen des ersten

- Frankfurter Auschwitz-Prozesses (Marburg; 2017)
- 24 Constitutio Antoniniana (Gießen; 2017)

**Geoparks**

- 1 Bergstraße-Odenwald (2015)
- 2 Harz – Braunschweiger Land – Ostfalen (2015)
- 3 Schwäbische Alb (2015)
- 4 TERRA.vita (2015)
- 5 Vulkaneifel (2015)
- 6 Muskauer Faltenbogen/Luk Muzakowa (2015), mit Polen
- 7 Thüringen Inselberg – Drei Gleichen (2021)

**Biosphärenreservate**

- 1 Flusslandschaft Elbe (1979, erweitert 1997)
- 2 Thüringer Wald (1979, erweitert 1986, 1990, 2016, 2018)
- 3 Berchtesgadener Land (1990, erweitert 2010)
- 4 Schorfheide-Chorin (1990)
- 5 Schleswig-Holsteinisches Wattenmeer und Halligen (1990)
- 6 Rhön (1991, erweitert 2014)
- 7 Spreewald (1991)
- 8 Südost-Rügen (1991)
- 9 Hamburgisches Wattenmeer (1992)
- 10 Niedersächsisches Wattenmeer (1992)
- 11 Pfälzerwald-Nordvogesen (1992, erweitert 1998), mit Frankreich
- 12 Oberlausitzer Heide- und Teichlandschaft (1996)
- 13 Schaalsee (2000)
- 14 Bliesgau (2009)
- 15 Schwäbische Alb (2009)
- 16 Schwarzwald (2017)

**Immatrielles Kulturerbe der Menschheit**

Es ist nur der jeweils erstgenannte Ort in die Karte aufgenommen worden.

- 1 Falknerei (Seelze, Hamminkeln, Gehaus; 2016), transnational
- 2 Genossenschaftsidee (Delitzsch, Hachenburg; 2016)
- 3 Orgelbau und Orgelmusik (u. a. Karlsruhe, Laberweinting, Mettlach, Speyer; 2017)
- 4 Blaudruck (Jever, Einbeck, Erfurt, Pulsnitz, Lüdinghausen, Berlin, Wolsier, Coswig, Scheeßel, Ruhmannsfelden; 2018), transnational
- 5 Bauhüttenwesen (Aachen, Bamberg, Dresden, Freiburg, Köln, Lübeck, Mainz, Passau, Regensburg, Schwäbisch Gmünd, Soest, Ulm, Xanten; 2020)

**Erklärung**

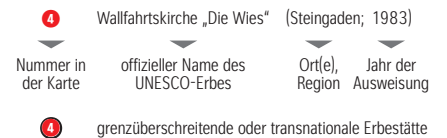

Betrifft ein UNESCO-Erbe mehrere Orte, so wurden aufgrund der Übersichtlichkeit in der Karte nicht immer alle dargestellt.  
Betrifft ein UNESCO-Erbe auch Orte außerhalb Deutschlands, so wurden diese in der Karte nicht dargestellt.

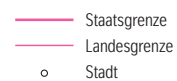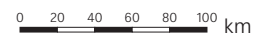

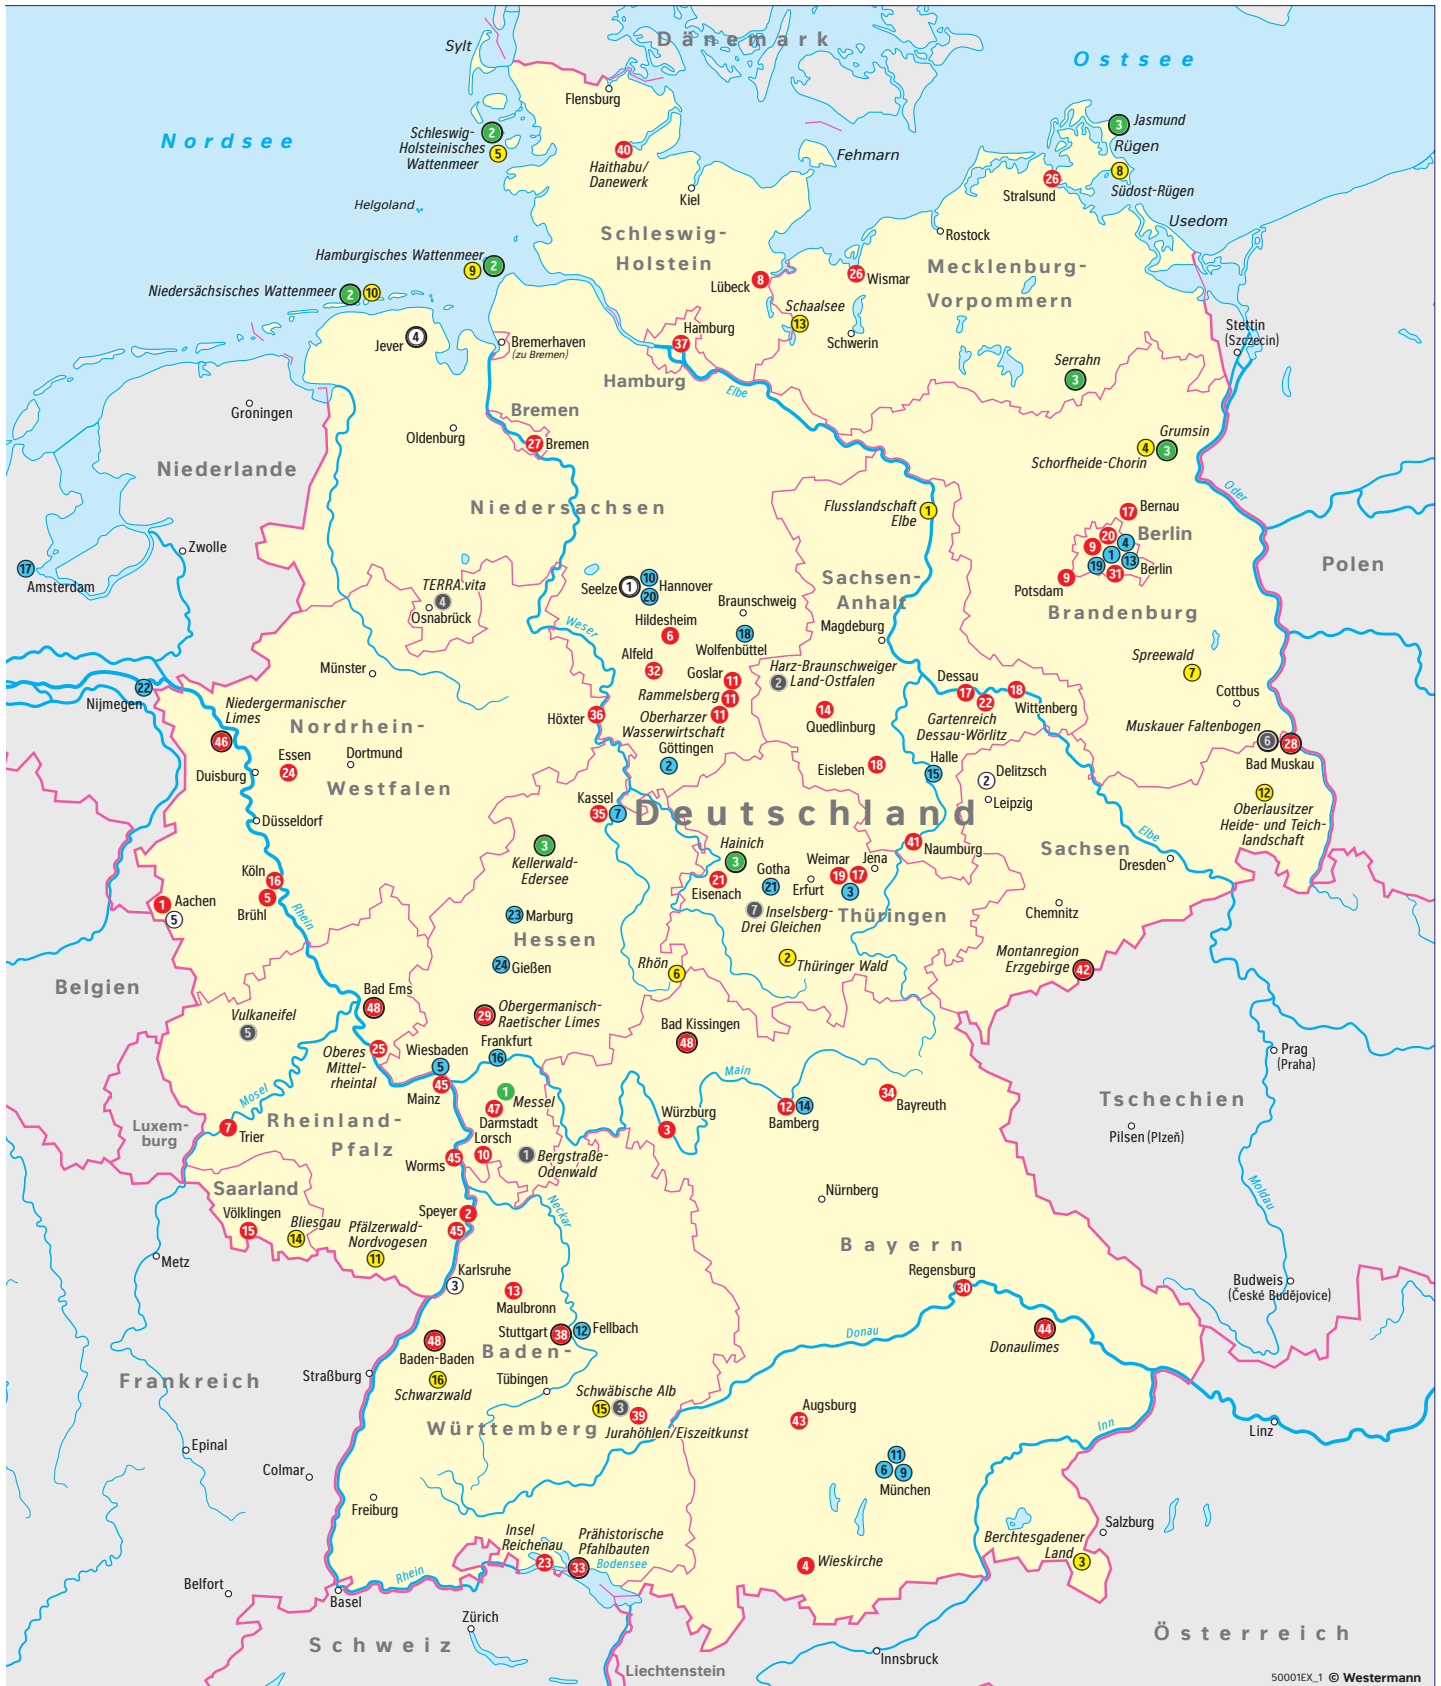

Supplement: Supplementary file 6 [file 7e524044d566bbd77d030de2.pdf]
