# Supplementary material
Source: Research Square preprint supplement (doi:10.21203/rs.3.rs-8766277/v1)
Supplement: Supplementary file 13 [file ed60b7bd068aaea761a7e8ee.pdf]

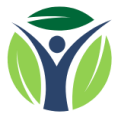

## Milestones and Benchmarks-Tool

| Phase 1 – Informieren                                                                                            |                                                          |                |                      |                 |                                      |                      |                |           |
|------------------------------------------------------------------------------------------------------------------|----------------------------------------------------------|----------------|----------------------|-----------------|--------------------------------------|----------------------|----------------|-----------|
|                                                                                                                  | Inwieweit trifft die Aussage zur Umsetzung der Phase zu? |                |                      |                 | Wie schwierig war/ist die Umsetzung? |                      |                |           |
|                                                                                                                  | Trifft zu                                                | Trifft eher zu | Trifft eher nicht zu | Trifft nicht zu | Nicht schwierig                      | Eher nicht schwierig | Eher schwierig | Schwierig |
| Das Lernformat FREI DAY ist klar (Methoden, Ziele usw.).                                                         |                                                          |                |                      |                 |                                      |                      |                |           |
| Der Prozess zur Einführung des FREI DAY ist klar.                                                                |                                                          |                |                      |                 |                                      |                      |                |           |
| Praxisbeispiele zur Umsetzung des FREI DAY sind bekannt.                                                         |                                                          |                |                      |                 |                                      |                      |                |           |
| Die Unterstützungsangebote von <i>Schule im Aufbruch</i> zur Einführung und Umsetzung des FREI DAY sind bekannt. |                                                          |                |                      |                 |                                      |                      |                |           |

| Phase 2 – Verbündete finden                                                                                     |                                                          |                |                      |                 |                                      |                      |                |           |
|-----------------------------------------------------------------------------------------------------------------|----------------------------------------------------------|----------------|----------------------|-----------------|--------------------------------------|----------------------|----------------|-----------|
|                                                                                                                 | Inwieweit trifft die Aussage zur Umsetzung der Phase zu? |                |                      |                 | Wie schwierig war/ist die Umsetzung? |                      |                |           |
|                                                                                                                 | Trifft zu                                                | Trifft eher zu | Trifft eher nicht zu | Trifft nicht zu | Nicht schwierig                      | Eher nicht schwierig | Eher schwierig | Schwierig |
| Verbündete (Kolleg/-innen, Eltern, Schüler/-innen) für die Einführung des FREI DAY sind an der Schule gefunden. |                                                          |                |                      |                 |                                      |                      |                |           |
| Die Schulleitung ist mit eingebunden und überzeugt.                                                             |                                                          |                |                      |                 |                                      |                      |                |           |
| Erwartungen und Ziele für die Zusammenarbeit sind gemeinsam geklärt.                                            |                                                          |                |                      |                 |                                      |                      |                |           |
| Ein Zeitplan zur Einführung des FREI DAY ist gemeinsam erstellt.                                                |                                                          |                |                      |                 |                                      |                      |                |           |



|                                                                                                   |  |  |  |  |  |  |  |  |
|---------------------------------------------------------------------------------------------------|--|--|--|--|--|--|--|--|
| Schule im Aufbruch ist über die Einführung unseres FREI DAY informiert.                           |  |  |  |  |  |  |  |  |
| Unsere Schule ist mit anderen FREI DAY Schulen vernetzt.                                          |  |  |  |  |  |  |  |  |
| Es ist entschieden, den FREI DAY entweder als Pilotversuch zu starten oder schulweit einzuführen. |  |  |  |  |  |  |  |  |
| Die Zustimmung der Schulleitung liegt vor.                                                        |  |  |  |  |  |  |  |  |

Wenn FREI DAY als Pilotversuch gestartet werden soll: **Weiter mit Phase 3 „Pilotphase vorbereiten“.**

Wenn FREI DAY in der ganzen Schule umgesetzt werden soll: **Weiter mit Phase 6 „Lernformat verankern“.**

| Phase 3 – Pilotphase vorbereiten                                                        |                                                          |                |                      |                 |                                      |                      |                |           |
|-----------------------------------------------------------------------------------------|----------------------------------------------------------|----------------|----------------------|-----------------|--------------------------------------|----------------------|----------------|-----------|
|                                                                                         | Inwieweit trifft die Aussage zur Umsetzung der Phase zu? |                |                      |                 | Wie schwierig war/ist die Umsetzung? |                      |                |           |
|                                                                                         | Trifft zu                                                | Trifft eher zu | Trifft eher nicht zu | Trifft nicht zu | Nicht schwierig                      | Eher nicht schwierig | Eher schwierig | Schwierig |
| Das Kollegium ist über den Pilotversuch informiert.                                     |                                                          |                |                      |                 |                                      |                      |                |           |
| Zeitraum und beteiligte Klassen(stufen) für den Pilotversuch sind festgelegt.           |                                                          |                |                      |                 |                                      |                      |                |           |
| Die Schüler/-innen der Pilotklassen und deren Eltern sind informiert.                   |                                                          |                |                      |                 |                                      |                      |                |           |
| Rollen und Aufgaben der am Pilotversuch beteiligten Lehrkräfte sind festgelegt.         |                                                          |                |                      |                 |                                      |                      |                |           |
| Der Fortbildungsbedarf für die beteiligten Kolleg/-innen ist identifiziert.             |                                                          |                |                      |                 |                                      |                      |                |           |
| Angebote, die den Fortbildungsbedarf zum FREI DAY im Kollegium decken, sind geschaffen. |                                                          |                |                      |                 |                                      |                      |                |           |
| Externe Kooperationspartner/-innen sind identifiziert.                                  |                                                          |                |                      |                 |                                      |                      |                |           |



|                                                                                                 |  |  |  |  |  |  |  |  |
|-------------------------------------------------------------------------------------------------|--|--|--|--|--|--|--|--|
| Die Hinführung der Schüler/-innen zu den SDGs und zur eigenständigen Projektarbeit ist geplant. |  |  |  |  |  |  |  |  |
|-------------------------------------------------------------------------------------------------|--|--|--|--|--|--|--|--|

| Phase 4 – Pilotphase umsetzen                                                                    |                                                          |                |                      |                 |                                      |                      |                |           |
|--------------------------------------------------------------------------------------------------|----------------------------------------------------------|----------------|----------------------|-----------------|--------------------------------------|----------------------|----------------|-----------|
|                                                                                                  | Inwieweit trifft die Aussage zur Umsetzung der Phase zu? |                |                      |                 | Wie schwierig war/ist die Umsetzung? |                      |                |           |
|                                                                                                  | Trifft zu                                                | Trifft eher zu | Trifft eher nicht zu | Trifft nicht zu | Nicht schwierig                      | Eher nicht schwierig | Eher schwierig | Schwierig |
| Der Pilotversuch ist dokumentiert (Foto, Video).                                                 |                                                          |                |                      |                 |                                      |                      |                |           |
| Die Lehrkräfte tauschen sich über ihre Erfahrungen aus (kollegiale Fallberatung, Lösungsansätze) |                                                          |                |                      |                 |                                      |                      |                |           |
| Der Pilotversuch ist abgeschlossen.                                                              |                                                          |                |                      |                 |                                      |                      |                |           |
| Gelingensbedingungen und Erfolgsfaktoren des FREI DAY sind identifiziert.                        |                                                          |                |                      |                 |                                      |                      |                |           |
| Die Schulgemeinschaft erkennt das Potential des FREI DAY.                                        |                                                          |                |                      |                 |                                      |                      |                |           |

| Phase 5 – Pilotphase evaluieren                                                                         |                                                          |                |                      |                 |                                      |                      |                |           |
|---------------------------------------------------------------------------------------------------------|----------------------------------------------------------|----------------|----------------------|-----------------|--------------------------------------|----------------------|----------------|-----------|
|                                                                                                         | Inwieweit trifft die Aussage zur Umsetzung der Phase zu? |                |                      |                 | Wie schwierig war/ist die Umsetzung? |                      |                |           |
|                                                                                                         | Trifft zu                                                | Trifft eher zu | Trifft eher nicht zu | Trifft nicht zu | Nicht schwierig                      | Eher nicht schwierig | Eher schwierig | Schwierig |
| Es finden regelmäßige Reflexionsgespräche mit den Schüler/-innen statt.                                 |                                                          |                |                      |                 |                                      |                      |                |           |
| Der Pilotversuch ist gemeinsam mit allen Beteiligten evaluiert (Gruppengespräche, World Café, Umfrage). |                                                          |                |                      |                 |                                      |                      |                |           |
| Nächste Schritte sind anhand der Evaluation abgeleitet.                                                 |                                                          |                |                      |                 |                                      |                      |                |           |

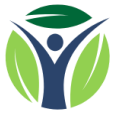

|                                                                                   |  |  |  |  |  |  |  |  |
|-----------------------------------------------------------------------------------|--|--|--|--|--|--|--|--|
| Erfahrungen zum FREI DAY sind gesammelt und der Schulgemeinschaft zugänglich.     |  |  |  |  |  |  |  |  |
| Die Entscheidung als Schulgemeinschaft den FREI DAY weiterzuführen ist getroffen. |  |  |  |  |  |  |  |  |
| Offene FREI DAY Bausteine sind erarbeitet und überarbeitet.                       |  |  |  |  |  |  |  |  |
| Die nächste Evaluation ist terminiert.                                            |  |  |  |  |  |  |  |  |

| Phase 6 – Lernformat verankern                                                                                                                                   |                                                          |                |                      |                 |                                      |                      |                |           |
|------------------------------------------------------------------------------------------------------------------------------------------------------------------|----------------------------------------------------------|----------------|----------------------|-----------------|--------------------------------------|----------------------|----------------|-----------|
|                                                                                                                                                                  | Inwieweit trifft die Aussage zur Umsetzung der Phase zu? |                |                      |                 | Wie schwierig war/ist die Umsetzung? |                      |                |           |
|                                                                                                                                                                  | Trifft zu                                                | Trifft eher zu | Trifft eher nicht zu | Trifft nicht zu | Nicht schwierig                      | Eher nicht schwierig | Eher schwierig | Schwierig |
| Das Konzept des FREI DAY ist an die Gegebenheiten der eigenen Schule angepasst.                                                                                  |                                                          |                |                      |                 |                                      |                      |                |           |
| Schüler/-innen, Eltern und Kolleg/-innen sind aktiv an der Konzeption des FREI DAY beteiligt.                                                                    |                                                          |                |                      |                 |                                      |                      |                |           |
| Vorschläge für die FREI DAY Studentafel sind erarbeitet.                                                                                                         |                                                          |                |                      |                 |                                      |                      |                |           |
| Das Konzeptpapier (Visionen, Ziele, Lernformate, Einführungsphase) ist verschriftlicht.                                                                          |                                                          |                |                      |                 |                                      |                      |                |           |
| Informations- und Austauschformate sind durchgeführt (z.B. Elternabende, Kaffeepausen im Lehrerzimmer, öffentliche Ausstellung von Projektideen, Hospitationen). |                                                          |                |                      |                 |                                      |                      |                |           |
| Fragen und Bedenken der Schulgemeinschaft zum FREI DAY sind geklärt.                                                                                             |                                                          |                |                      |                 |                                      |                      |                |           |
| Eine 2/3-Mehrheit der Schulgemeinschaft zur Einführung des FREI DAY ist gewonnen.                                                                                |                                                          |                |                      |                 |                                      |                      |                |           |
| Die Einführung des FREI DAY ist durch die Schulkonferenz beschlossen.                                                                                            |                                                          |                |                      |                 |                                      |                      |                |           |



| Phase 7 – Umsetzung vorbereiten                                                                                        |                                                          |                |                      |                 |                                      |                      |                |           |
|------------------------------------------------------------------------------------------------------------------------|----------------------------------------------------------|----------------|----------------------|-----------------|--------------------------------------|----------------------|----------------|-----------|
|                                                                                                                        | Inwieweit trifft die Aussage zur Umsetzung der Phase zu? |                |                      |                 | Wie schwierig war/ist die Umsetzung? |                      |                |           |
|                                                                                                                        | Trifft zu                                                | Trifft eher zu | Trifft eher nicht zu | Trifft nicht zu | Nicht schwierig                      | Eher nicht schwierig | Eher schwierig | Schwierig |
| Ein Leitfaden für das Kollegium zur Begleitung des FREI DAY (Rolle, Aufgaben etc.) ist entwickelt und verschriftlicht. |                                                          |                |                      |                 |                                      |                      |                |           |
| Der Fortbildungsbedarf der Lehrkräfte ist ermittelt.                                                                   |                                                          |                |                      |                 |                                      |                      |                |           |
| Die Fortbildungen für das Kollegium sind erfolgt.                                                                      |                                                          |                |                      |                 |                                      |                      |                |           |
| Kontakte zu Akteur/-innen der außerschulischen Bildungslandschaft sind aufgebaut.                                      |                                                          |                |                      |                 |                                      |                      |                |           |
| Zusammenarbeitsmöglichkeiten mit außerschulischen Akteur/-innen sind vereinbart.                                       |                                                          |                |                      |                 |                                      |                      |                |           |
| Die (Groß-)Eltern sind aktiviert und in den FREI DAY (insbesondere als Unterstützungsstrukturen) eingebunden.          |                                                          |                |                      |                 |                                      |                      |                |           |
| Das Kick-Off zur Einführung des FREI DAY ist geplant (Termin, Ablauf).                                                 |                                                          |                |                      |                 |                                      |                      |                |           |
| Die Schüler/-innen sind methodisch und inhaltlich auf ihre Projektarbeit im FREI DAY vorbereitet.                      |                                                          |                |                      |                 |                                      |                      |                |           |



Phase 8 – Umsetzen

|                                                                                                                                                  | Inwieweit trifft die Aussage zur Umsetzung der Phase zu? |                |                      |                 | Wie schwierig war/ist die Umsetzung? |                      |                |           |
|--------------------------------------------------------------------------------------------------------------------------------------------------|----------------------------------------------------------|----------------|----------------------|-----------------|--------------------------------------|----------------------|----------------|-----------|
|                                                                                                                                                  | Trifft zu                                                | Trifft eher zu | Trifft eher nicht zu | Trifft nicht zu | Nicht schwierig                      | Eher nicht schwierig | Eher schwierig | Schwierig |
| Der FREI DAY ist von der Schulgemeinschaft und den außerschulischen Akteur/-innen gemeinsam gestartet.                                           |                                                          |                |                      |                 |                                      |                      |                |           |
| Räume, Zeiten und Methoden sind geschaffen, die Schüler/-innen dabei unterstützen, eigene Projektideen zu den SDGs zu entwickeln.                |                                                          |                |                      |                 |                                      |                      |                |           |
| Es bestehen fortlaufende Feedbackmöglichkeiten für alle Beteiligten, um Erfahrungen gemeinsam zu reflektieren und Verbesserungen zu erarbeiten.  |                                                          |                |                      |                 |                                      |                      |                |           |
| Regelmäßige Reflexionsgespräche mit allen Schüler/-innen-Teams zum gemeinsamen Projektprozess und zu individuellen Lernerfahrungen finden statt. |                                                          |                |                      |                 |                                      |                      |                |           |
